# Supplementary material for: V5 and GFP Tagging of Viral Gene pp38 of Marek’s Disease Vaccine Strain CVI988 Using CRISPR/Cas9 Editing
Source: MDPI journal article supplement (doi:10.3390/v14020436), 2022-02-21
Supplement: s1 [file s1]

Supplementary Video S1. Growth of CVI988-pp38-GFP virus monitored in real time using In-cuCyte S3 live imaging system. GFP cell phase object of CVI988-pp38-GFP virus was captured every 4h for 112 h from 36 separate regions per well by IncuCyte S3. Images of one region from all time points was exported to generate movie. The scale bar, 400  $\mu$ m.
